# Supplementary material for: CXCL10+ peripheral activation niches couple preferred sites of Th1 entry with optimal APC encounter
Source: PubMed Central journal article supplement — Cell Rep. Author manuscript; Available in PMC 2022 Jun 23. (PMC9218982; doi:10.1016/j.celrep.2021.109523), 2021-08-10
Supplement: NIHMS1812328-supplement-s2.pdf [file NIHMS1812328-supplement-s2.pdf]

**Cell Reports, Volume 36**

**Supplemental information**

**CXCL10<sup>+</sup> peripheral activation**

**niche couple preferred sites of Th1**

**entry with optimal APC encounter**

**Hen Prizant, Nilesh Patil, Seble Negatu, Noor Bala, Alexander McGurk, Scott A. Leddon, Angela Hughson, Tristan D. McRae, Yu-Rong Gao, Alexandra M. Livingstone, Joanna R. Groom, Andrew D. Luster, and Deborah J. Fowell**

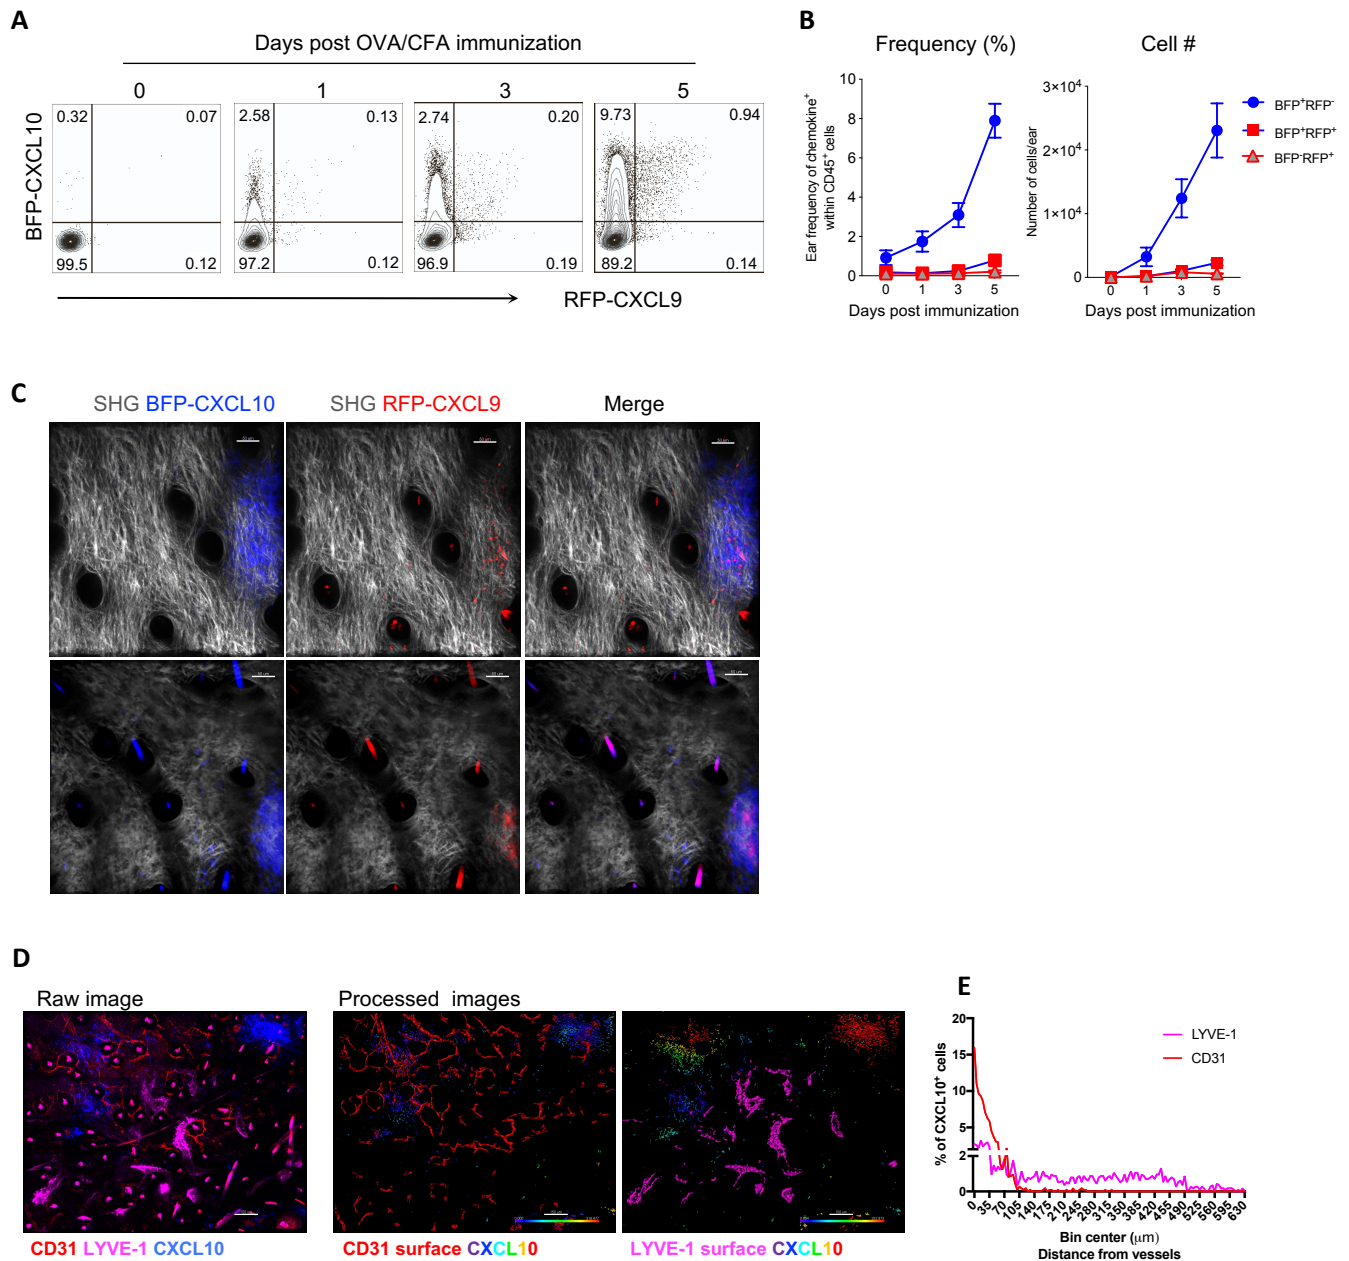

**Figure S1. CXCR3 chemokine expression and distribution within the inflamed skin**

REX3 mice immunized with OVA/CFA in the ear dermis. **(A)** Representative plots and quantification **(B)** of frequency (left) and number (right) of BFP-CXCL10 and RFP-CXCL9 expressing cells within live singlets CD45<sup>+</sup> cells, by flow cytometry. **(C)** Two representative chemokine-rich clusters with colocalization of BFP-CXCL10<sup>+</sup> cells with RFP-CXCL9<sup>+</sup> cells. Scale bar, 50 μm. **(D)** Representative IV-MPM tiled image and **(E)** quantification of BFP-CXCL10<sup>+</sup> cells distance from CD31<sup>+</sup> and LYVE-1<sup>+</sup> vessels within the same representative imaging volume. Scale bar, 100 μm. Anti-CD31 and anti-LYVE-1 antibodies co-injected i.d. to the ear 2 hours prior to imaging. Related to Figure 1.

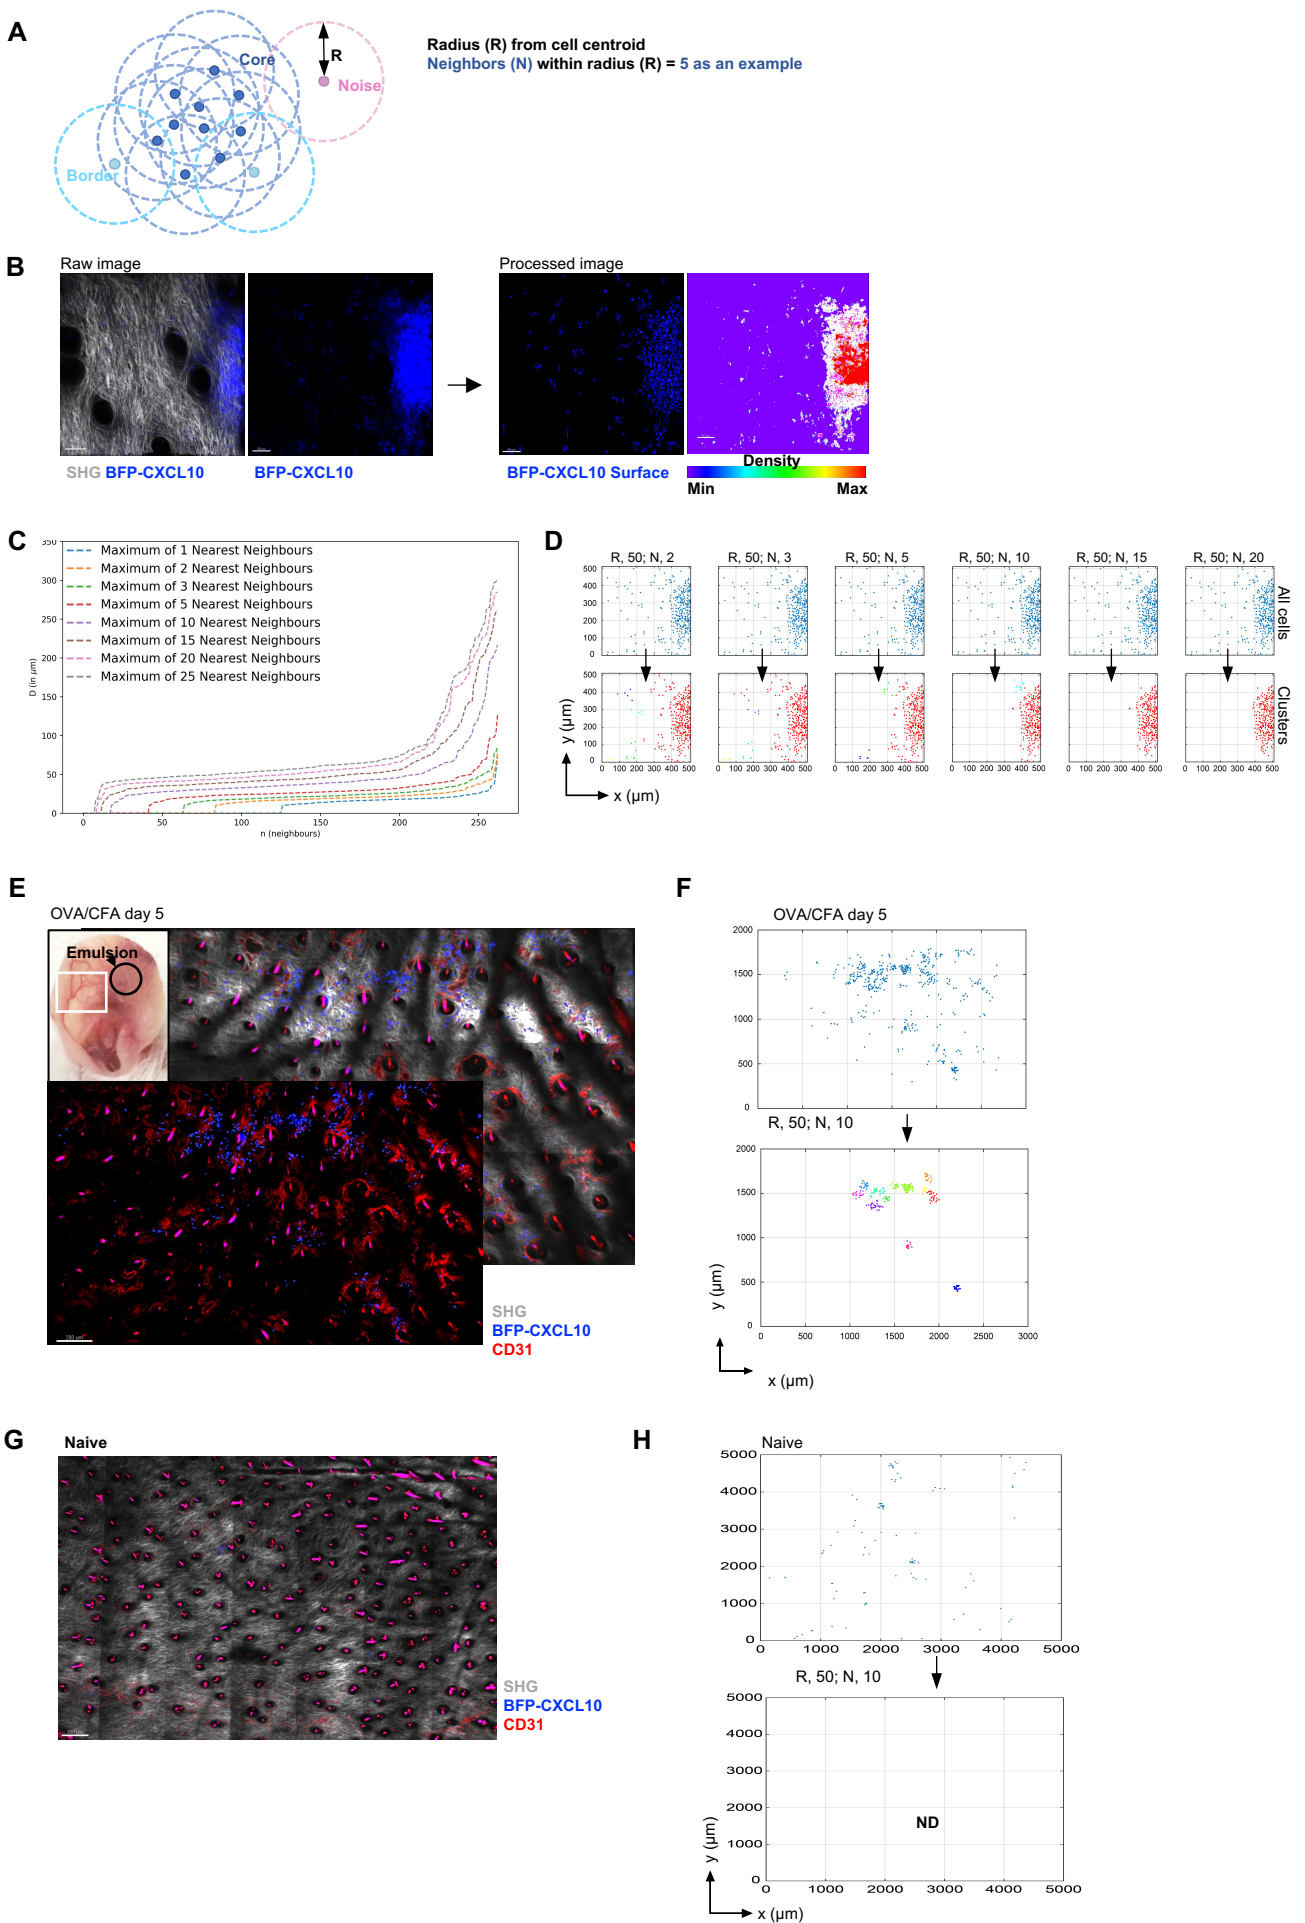

Figure S2. Selecting criteria for BFP-CXCL10<sup>+</sup> cell clustering

## Figure S2. Selecting criteria for BFP-CXCL10<sup>+</sup> cell clustering

DBSCAN-based machine learning algorithm was developed to unbiasedly and semi-automatically define cell clusters in 3D across different inflamed ears and conditions, using Python. **(A)** Clusters were defined as regions of high density. Each BFP-CXCL10<sup>+</sup> cells was reconstructed, rendered and registered as a point in space using Imaris and Python. A point (cell centroid) was designated a given radius, R ( $\mu\text{m}$ ). Each point was defined as a core point within the cluster if it had at least a specified number of neighbor points (N) within its specified radius (R). A point was defined a boarder point if it had fewer than N points within R, but had at least one core point in its radius. A noise point was any point that was not a core point nor a border point, and therefore not part of a cluster. **(B)** BFP-CXCL10<sup>+</sup> cell cluster (blue) within the d5 OVA/CFA immunized REX3 dermis, by IV-MPM: gray, SHG; scale bar, 50 $\mu\text{m}$ . In processed image, BFP-CXCL10<sup>+</sup> cells were reconstructed and volumetrically rendered along with a cluster surface rendering in 3D using Imaris. **(C)** Combinations of different R and N were plotted using a grid-search approach to find inflection points after which return on metric of choice is incremental. **(D)** Visual examples of different N cutoffs with R=50  $\mu\text{m}$ , using DBSCAN-based algorithm in Python. **(E)** BFP-CXCL10<sup>+</sup> cell clusters (blue) within d5 OVA/CFA immunized REX3 dermis, tiled image composed of 18 imaging fields of 500 (x) x 500 (y) x 60 (z)  $\mu\text{m}$  by IV-MPM: CD31<sup>+</sup> vessels, red; tiled image scale bar, 200 $\mu\text{m}$ . **(F)** DBSCAN-based algorithm was used for 3D cluster identification (multi-color) and reconstruction, using Python; R=50  $\mu\text{m}$ , N=10. **(G)** BFP-CXCL10<sup>+</sup> cells (blue) within a naïve REX3 dermis, tiled image composed of 18 imaging fields as in E. **(H)** DBSCAN-based algorithm was used for 3D cluster identification and reconstruction, using Python; R=50  $\mu\text{m}$ , N=10. Related to Figures 1, 3 and 5.



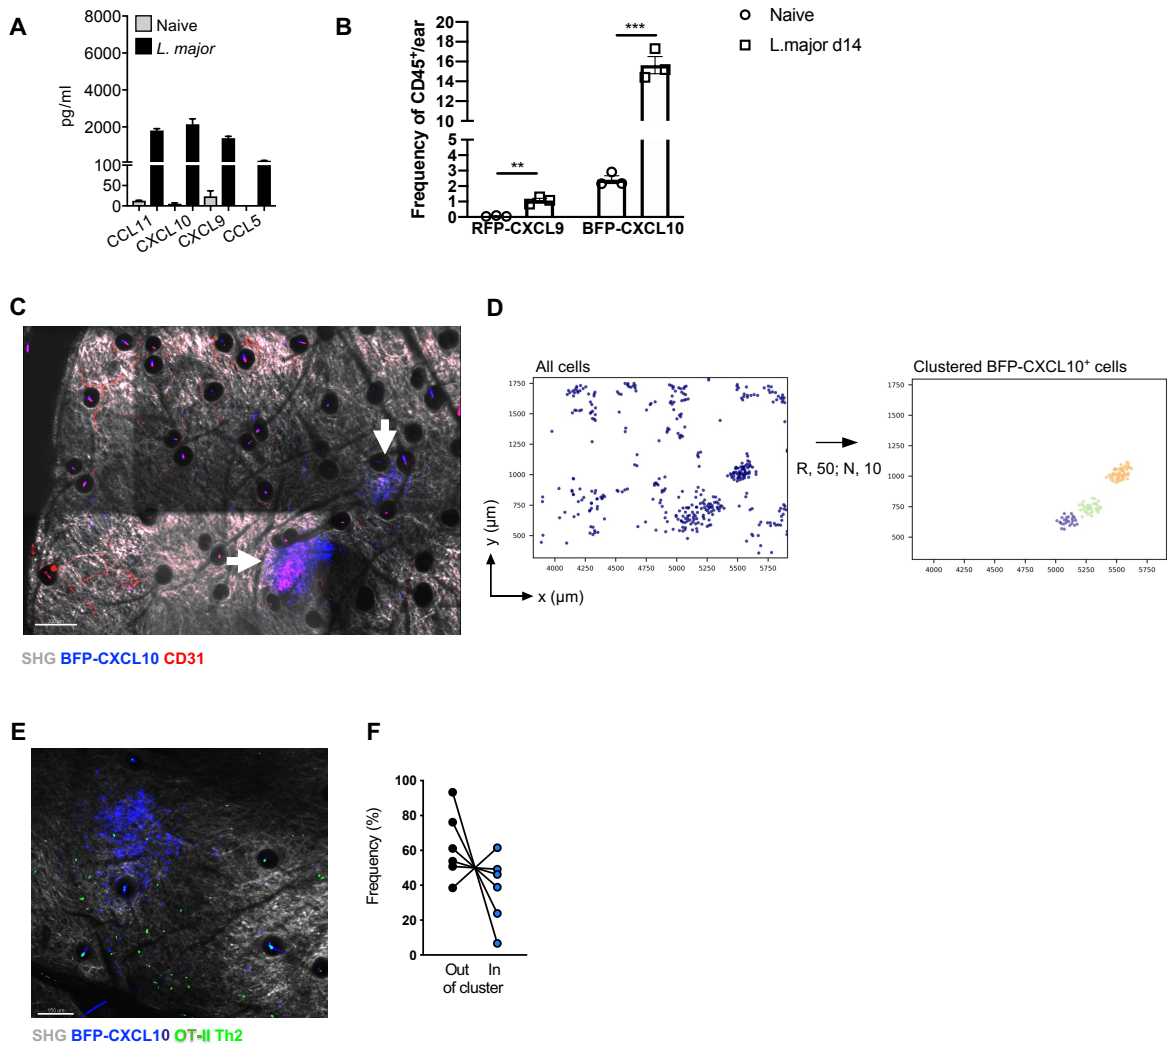

**Figure S3. CXCL10<sup>+</sup> cell clustering in the *L. major* infected skin and lack of spatial preference for Th2 cells.**

(A) Chemokine protein levels from naïve and 14-day *L. major* infected WT ears, by Luminex. (B) frequency of BFP-CXCL10 and RFP-CXCL9 expressing cells within live singlets CD45<sup>+</sup> cells from 14 day *L. major* infected REX3 ears, by flow cytometry. (C) Perivascular clustering of BFP-CXCL10<sup>+</sup> cells (blue) within 14-day *L. major* infected REX3 dermis, by IV-MPM: scale bar, 200  $\mu$ m; gray, SHG; anti-CD31 (red) antibody injected i.v. 15 minutes before imaging. (D) Cluster analysis using DBSCAN-based algorithm. A-D Related to Figure 1. (E) Adoptively transferred fluorescently labeled OT-II Th2 cell (green) localization to BFP-CXCL10<sup>+</sup> clusters (blue) within d5 OVA/CFA immunized REX3 ear. Maximal z-projection image by IV-MPM: scale bar, 50 $\mu$ m. (F) Percentage of OT-II Th2 cells inside or outside of BFP-CXCL10<sup>+</sup> clusters in d5 OVA/CFA immunized REX3 dermis, by IV-MPM and Imaris. Pooled data from 3 independent experiments, 6 ears, 12 imaging volumes. E-F Related to Figure 2.

**A** OVA/CFA day 5

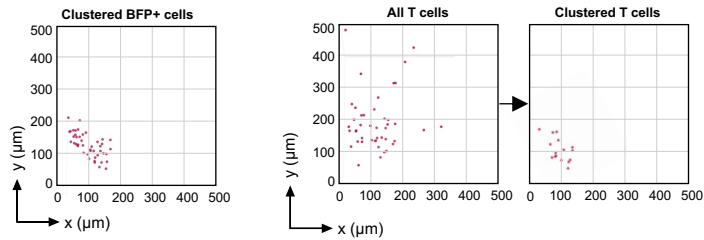

**B** KLH/CFA day 5

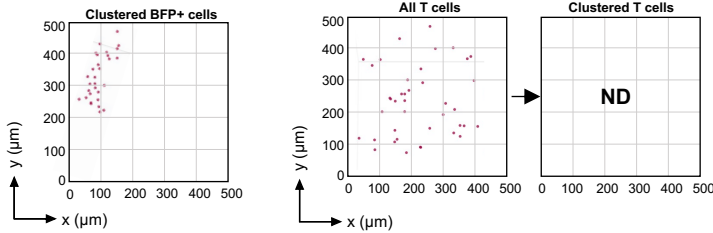

**C** Isotype Control Antibody

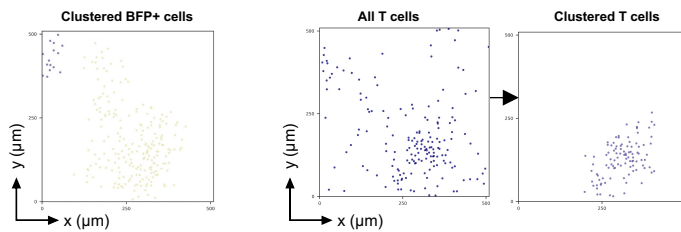

Anti-MHC-II Antibody

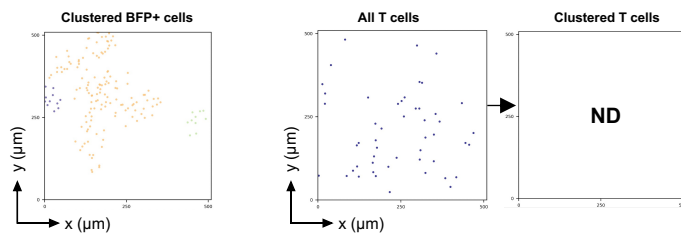

**Figure S4. Antigen-dependent Th1 accumulation in BFP-CXCL10<sup>+</sup> clusters**

Adoptively transferred fluorescently labeled OT-II WT Th1 cell localization to BFP-CXCL10<sup>+</sup> clusters within d5 OVA/CFA and KLH/CFA immunized REX3 ear identified by multiphoton microscopy. **(A, B)** DBSCAN-based algorithm for semi-automated 3D cluster reconstruction of BFP-CXCL10<sup>+</sup> (left) and Th1 cells (right) from OVA/CFA **(A)** and KLH/CFA **(B)** immunized REX3 ears. ND, none detected. Representative analysis of images shown in Fig. 2D. **(C)** Th1 transfers and immunization with OVA/CFA were performed as in **(A, B)**. Six hours prior to imaging, isotype control or anti-MHC-II Ab was administered i.d. in the d5 immunized ear. Multiphoton images were analyzed using the DBSCAN-based algorithm for semi-automated 3D cluster reconstruction of BFP<sup>+</sup> cells and transferred Th1 cells. Related to Figure 2.

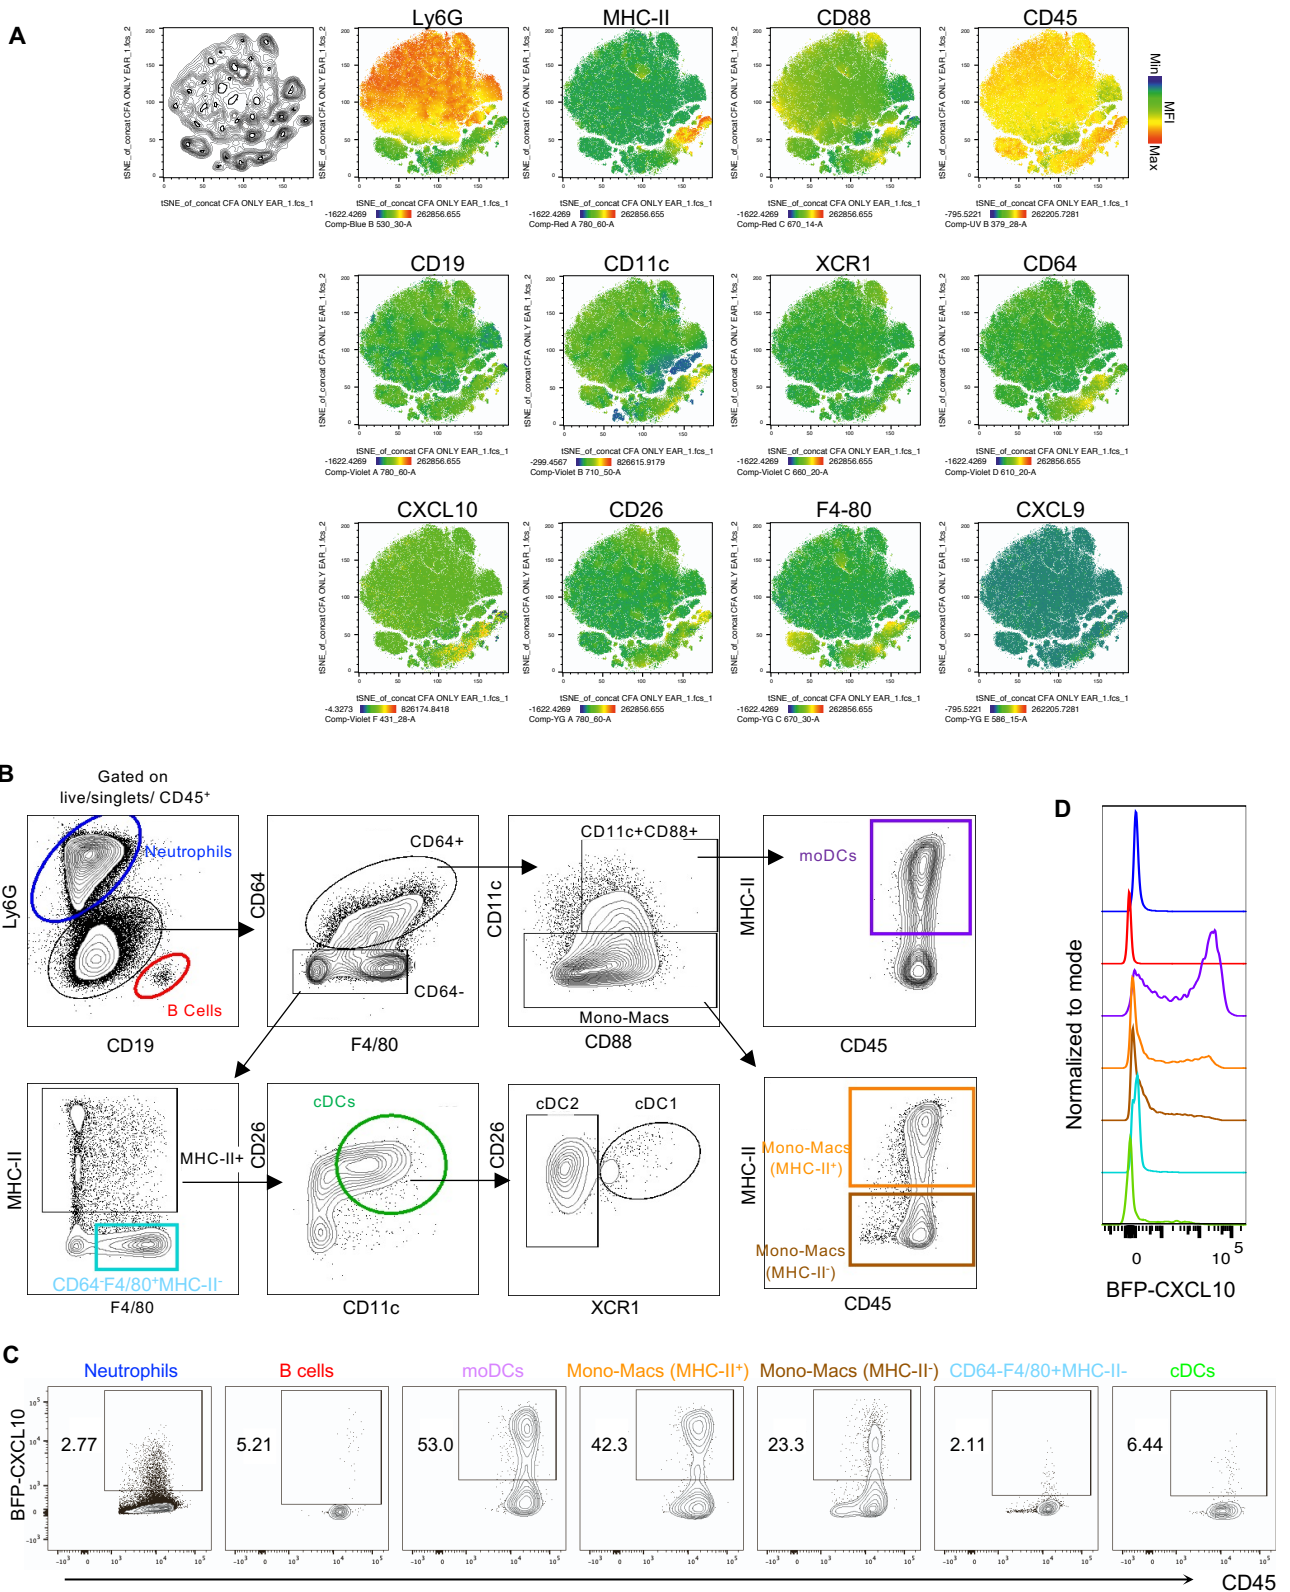

**Figure S5. Gating strategies to define the immune subsets with the inflamed skin**

(A) tSNE analysis was performed on singlet live CD45<sup>+</sup> cells using concatenated multi-color flow cytometry data from d5 OVA/CFA immunized REX3 ears. (B) Gating strategy to define the immune subsets within the immunized skin, pre-gated on singlet live CD45<sup>+</sup> cells: Neutrophils, Ly6G<sup>high</sup>; B cells, CD19<sup>+</sup>; moDCs, Ly6G<sup>low</sup>CD19<sup>-</sup>CD64<sup>+</sup>F4/80<sup>+</sup>CD11c<sup>+</sup>MHC-II<sup>+</sup>; Mono-Macs (MHC-II<sup>+</sup>), Ly6G<sup>low</sup>CD19<sup>-</sup>CD64<sup>+</sup>F4/80<sup>+</sup>CD11c<sup>+</sup>MHC-II<sup>+</sup>; Mono-Macs (MHC-II<sup>-</sup>), Ly6G<sup>low</sup>CD19<sup>-</sup>CD64<sup>+</sup>F4/80<sup>+</sup>MHC-II<sup>-</sup>; CD64<sup>+</sup>F4/80<sup>+</sup>MHC-II<sup>-</sup>, Ly6G<sup>low</sup>CD19<sup>-</sup>CD64<sup>+</sup>F4/80<sup>+</sup>MHC-II<sup>-</sup>; cDCs, Ly6G<sup>low</sup>CD19<sup>-</sup>CD64<sup>+</sup>F4/80<sup>+</sup>/MHC-II<sup>+</sup>CD11c<sup>+</sup>CD26<sup>+</sup>; cDC1, CD26<sup>+</sup>XCR1<sup>+</sup>; cDC2, CD26<sup>+</sup>XCR1<sup>-</sup>. (C) Representative plots of BFP-CXCL10 expressing cells within each subset in (B), d5 OVA/CFA immunized REX3 ears. (D) Histograms of BFP-CXCL10 expression by subset. Related to Figure 4.

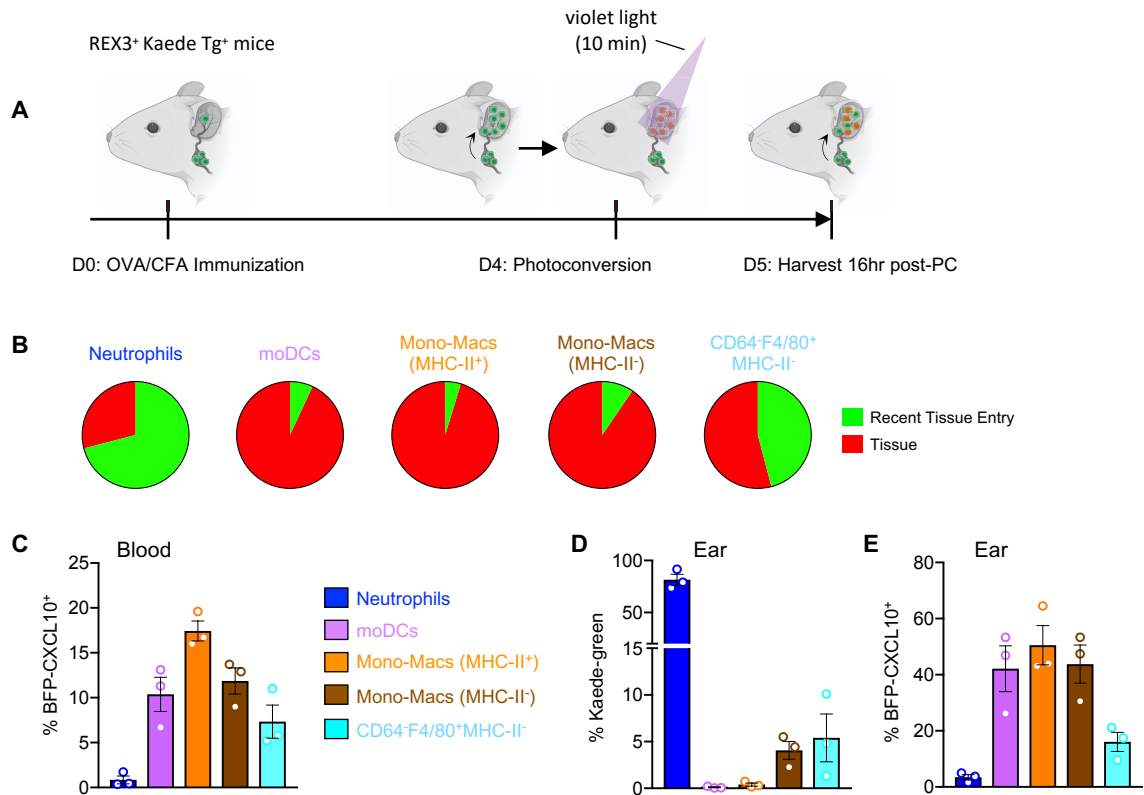

**Figure S6. BFP-CXCL10<sup>+</sup> monocyte and macrophage populations entering the tissue from the blood.** (A) REX3<sup>+</sup> Kaede Tg<sup>+</sup> mice were immunized in the ear pinna with OVA/CFA. Day 4, all Kaede-green cells in the inflamed ear were photoconverted to Kaede-red (98% Kaede-red). 16 hours later the ear tissue and blood were harvested for flow cytometry of innate immune subsets, Kaede red/green and BFP-CXCL10 expression: Kaede-red = tissue cells, Kaede-green = cells entering the tissue from the blood in the 16 hours post photo-conversion. Images created with BioRender.com. (B) Proportion of Kaede-red and Kaede-green cells within each innate cell subset from the inflamed ear. (C) Frequency of BFP-CXCL10<sup>+</sup> cells within innate subsets in the blood. All blood cells were Kaede-green. (D) Frequency of Kaede-green cells entering the tissue from circulation in the 16 hours period from photo-conversion. (E) Frequency of BFP-CXCL10<sup>+</sup> cells within the Kaede-green cells entering the tissue from circulation in the 16 hours period from photo-conversion. One representative experiment of 2 independent experiments, 3-4 mice per group. Related to Figure 4.

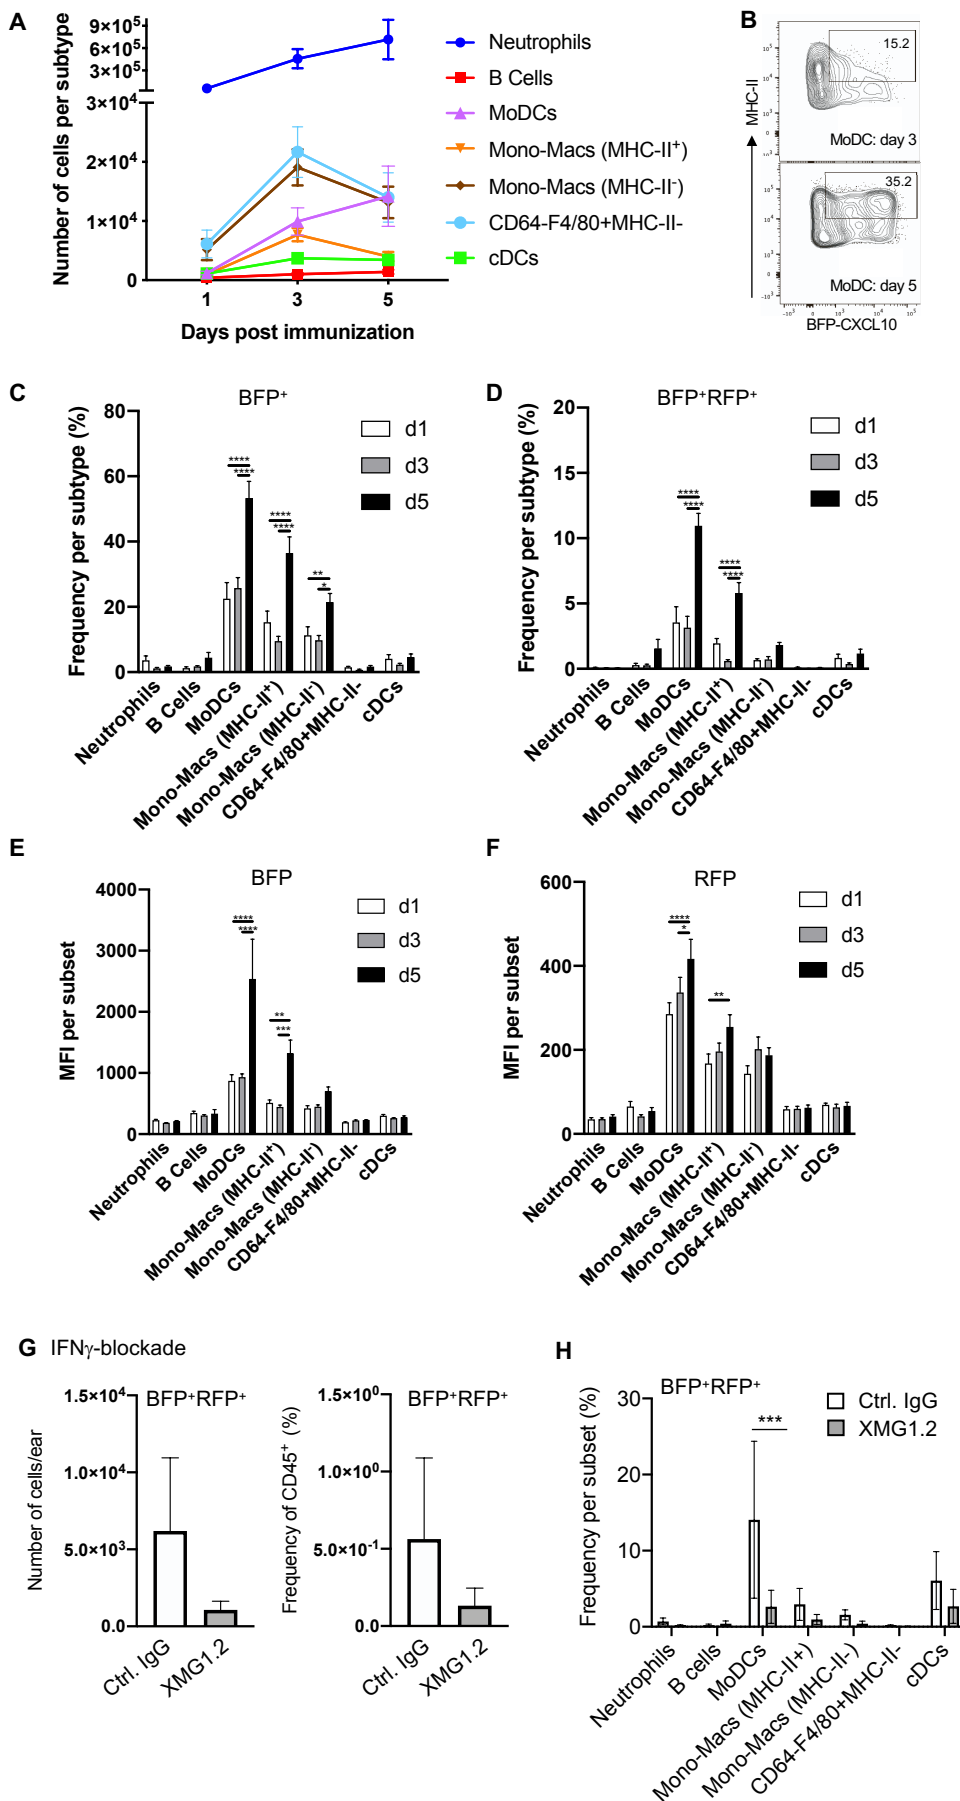

**Figure S7. Kinetic analysis of immune subsets and CXCR3 chemokine expression within the immunized skin.**

**Figure S7. Kinetic analysis of immune subsets and CXCR3 chemokine expression within the immunized skin. (A)** Number of cells per immune subset within live singlets CD45<sup>+</sup> cells from OVA/CFA immunized REX3 ears over time. **(B)** BFP-CXCL10 and MHC-II expression within the moDC population (Ly6G<sup>low</sup>CD64<sup>+</sup>F4/80<sup>+</sup>Cd11c<sup>+</sup>MHC-II<sup>+</sup>) in the ear skin of day 3 and day 5 OVA/CFA immunized REX3 mice. **(C)** Frequency of BFP-CXCL10<sup>+</sup> cells and **(D)** BFP-CXCL10<sup>+</sup>RFP-CXCL9<sup>+</sup> cells within each subtype from (B). **(E)** BFP-CXCL10 and **(F)** RFP-CXCL9 MFI within each immune subset from (B). Bars represent mean + SEM. Statistics by two-way ANOVA, \*p≤0.05, \*\*p≤0.01, \*\*\*p≤0.001, \*\*\*\*p≤0.0001. **(G) (H)** Number and frequency of BFP<sup>+</sup>RFP<sup>+</sup> cells in the OVA/CFA immunized REX3 ears following anti-IFN<sub>γ</sub> blockade (no Th1 transfer). 0.5mg anti-IFN<sub>γ</sub> Ab (XMG1.2) or control IgG was administered 1 day prior to immunization, the day of immunization (d0) and then daily (d1-d4). Statistics by two-way ANOVA, \*\*\*p≤0.001. Related to Figure 7.
